# Supplementary material for: Molecular Docking and Molecular Dynamics Studies Reveal the Anticancer Potential of Medicinal-Plant-Derived Lignans as MDM2-P53 Interaction Inhibitors
Source: MDPI journal article supplement (doi:10.3390/molecules28186665), 2023-09-16
Supplement: s1 [file s1]

## Supplementary Materials

# Molecular Docking and Molecular Dynamics Studies Reveal the Anticancer Potential of Medicinal-Plant-Derived Lignans as MDM2-P53 Interaction Inhibitors

Tagyedeem H. Shoaib <sup>1,†</sup>, Nihal Abdelmoniem <sup>1</sup>, Rua M. Mukhtar <sup>1</sup>, Amal Th. Alqhtani <sup>2</sup>, Abdullah L. Alalawi <sup>3</sup>, Razan Alawaji <sup>4</sup>, Mashael S. Althubyani <sup>2</sup>, Shaimaa G. A. Mohamed <sup>5</sup>, Gamal A. Mohamed <sup>6</sup>, Sabrin R. M. Ibrahim <sup>7,8,\*</sup>, Hazem G. A. Hussein <sup>9</sup> and Abdulrahim A. Alzain <sup>1,†,\*</sup>

<sup>1</sup> Department of Pharmaceutical Chemistry, Faculty of Pharmacy, University of Gezira, Wad Madani 21111, Sudan; shoaibth37@hotmail.com (T.H.S.); nihal.khunaijir@gmail.com (N.A.); ruamubarak1@gmail.com (R.M.M.)

<sup>2</sup> Pharmaceutical Care Services, Madinah Cardiac Center, MOH, Al Madinah Al Munawwarah 11176, Saudi Arabia; amtalqhtani@moh.gov.sa (A.T.A.); maalthubyani@moh.gov.sa (M.S.A.)

<sup>3</sup> Pharmaceutical Care Services, King Salman Medical City, MOH, Al Madinah Al Munawwarah 11176, Saudi Arabia; abdullahalalawi96@gmail.com

<sup>4</sup> Department of Pharmacology and Toxicology, College of Pharmacy, Qassim University, Qassim 51452, Saudi Arabia; razanalawaji@gmail.com

<sup>5</sup> Faculty of Dentistry, British University, El Sherouk City, Suez Desert Road, Cairo 11837, Egypt; shaimaag1973@gmail.com

<sup>6</sup> Department of Natural Products and Alternative Medicine, Faculty of Pharmacy, King Abdulaziz University, Jeddah 21589, Saudi Arabia; gahussein@kau.edu.sa

<sup>7</sup> Preparatory Year Program, Department of Chemistry, Batterjee Medical College, Jeddah 21442, Saudi Arabia

<sup>8</sup> Department of Pharmacognosy, Faculty of Pharmacy, Assiut University, Assiut 71526, Egypt

<sup>9</sup> Preparatory Year Program, Batterjee Medical College, Jeddah 21442, Saudi Arabia; hazemgamal2005@gmail.com

\* Correspondence: sabrin.ibrahim@bmc.edu.sa or sabreen.ibrahim@pharm.aun.edu.eg (S.R.M.I.); abdulrahim.altoam@uofg.edu.sd or abdulrahim.altoam@gmail.com (A.A.A.)

† These authors have contributed equally.

**Table S1.** List of *Justica Procumbens* and *Ferula sinkiangensis* lignans

| Compound Name                                                                                       | Mol. Wt. | Mol. Formula                                    |
|-----------------------------------------------------------------------------------------------------|----------|-------------------------------------------------|
| Justicidin A                                                                                        | 394      | C <sub>22</sub> H <sub>18</sub> O <sub>7</sub>  |
| 6'-Hydroxy justicidin A                                                                             | 410      | C <sub>22</sub> H <sub>18</sub> O <sub>8</sub>  |
| Justicidin B                                                                                        | 364      | C <sub>21</sub> H <sub>16</sub> O <sub>6</sub>  |
| 6'-Hydroxy justicidin B                                                                             | 380      | C <sub>21</sub> H <sub>16</sub> O <sub>7</sub>  |
| Neojusticin B = Justicidin C                                                                        | 394      | C <sub>22</sub> H <sub>18</sub> O <sub>7</sub>  |
| Neojusticin A = Justicidin D                                                                        | 378      | C <sub>21</sub> H <sub>14</sub> O <sub>7</sub>  |
| 6'-Hydroxy justicidin C                                                                             | 410      | C <sub>22</sub> H <sub>18</sub> O <sub>8</sub>  |
| Neojusticin C                                                                                       | 380      | C <sub>21</sub> H <sub>16</sub> O <sub>7</sub>  |
| Justicidin E                                                                                        | 348      | C <sub>20</sub> H <sub>12</sub> O <sub>6</sub>  |
| Phyllamyricin C                                                                                     | 394      | C <sub>22</sub> H <sub>18</sub> O <sub>7</sub>  |
| Taiwanin C = Lignan J <sub>1</sub>                                                                  | 378      | C <sub>21</sub> H <sub>14</sub> O <sub>7</sub>  |
| Taiwanin E                                                                                          | 364      | C <sub>20</sub> H <sub>12</sub> O <sub>7</sub>  |
| Taiwanin E methyl ether                                                                             | 378      | C <sub>21</sub> H <sub>14</sub> O <sub>7</sub>  |
| Chinensinaphthol                                                                                    | 380      | C <sub>21</sub> H <sub>16</sub> O <sub>7</sub>  |
| Chinensinaphthol methyl ether                                                                       | 394      | C <sub>22</sub> H <sub>18</sub> O <sub>7</sub>  |
| 4'-Demethylchinensinaphthol methyl ether                                                            | 380      | C <sub>21</sub> H <sub>16</sub> O <sub>7</sub>  |
| Procumphthalide A                                                                                   | 394      | C <sub>22</sub> H <sub>18</sub> O <sub>7</sub>  |
| Cilinaphthalide A                                                                                   | 396      | C <sub>22</sub> H <sub>20</sub> O <sub>7</sub>  |
| Cilinaphthalide B                                                                                   | 410      | C <sub>23</sub> H <sub>22</sub> O <sub>7</sub>  |
| Pronaphthalide A                                                                                    | 396      | C <sub>22</sub> H <sub>20</sub> O <sub>7</sub>  |
| 5'-Methoxy retrochinensin                                                                           | 394      | C <sub>22</sub> H <sub>18</sub> O <sub>7</sub>  |
| Diphyllin                                                                                           | 380      | C <sub>21</sub> H <sub>16</sub> O <sub>7</sub>  |
| Isodiphyllin                                                                                        | 380      | C <sub>21</sub> H <sub>16</sub> O <sub>7</sub>  |
| Tuberculatin (Diphyllin-1-O-β-D-apiofuranoside)                                                     | 512      | C <sub>26</sub> H <sub>24</sub> O <sub>11</sub> |
| Diphyllin apioside-5-acetate                                                                        | 554      | C <sub>28</sub> H <sub>26</sub> O <sub>12</sub> |
| Justicidin A (Justicidin C 6'-O-glucopyranoside)                                                    | 572      | C <sub>28</sub> H <sub>28</sub> O <sub>13</sub> |
| Justicidin B (Justicidin A 6'-O- glucopyranoside)                                                   | 572      | C <sub>28</sub> H <sub>28</sub> O <sub>13</sub> |
| Justicidin C (Justicidin B 6'-O- glucopyranoside)                                                   | 542      | C <sub>27</sub> H <sub>26</sub> O <sub>12</sub> |
| Procumbenoside A (4-O-α-L-Arabinopyranosyl-(1'''→2'')- β-D-apiofuranosyldiphyllin                   | 644      | C <sub>31</sub> H <sub>32</sub> O <sub>15</sub> |
| Procumbenoside B = Procumphthalide B (4-O-β-D-Glucopyranosyl-(1'''→2'')-β-D-apiofuranosyldiphyllin) | 674      | C <sub>32</sub> H <sub>34</sub> O <sub>16</sub> |
| Procumbenoside C                                                                                    | 526      | C <sub>26</sub> H <sub>22</sub> O <sub>12</sub> |
| Procumbenoside D                                                                                    | 542      | C <sub>27</sub> H <sub>26</sub> O <sub>12</sub> |

|                                                                                                                                                 |     |                                                 |
|-------------------------------------------------------------------------------------------------------------------------------------------------|-----|-------------------------------------------------|
| Procumbenoside H (4-O-β-D-Xylopyranosyl-(1''' → 5'')-β-D-apiofuranosyl diphyllin)                                                               | 644 | C <sub>31</sub> H <sub>32</sub> O <sub>15</sub> |
| Procumbenoside E (4-O-β-D-Bis-xylopyranosyl-(1''' → 5'', 1'''→2'')-β-D-apiofuranosyl diphyllin)                                                 | 776 | C <sub>36</sub> H <sub>40</sub> O <sub>19</sub> |
| Procumbenoside I                                                                                                                                | 528 | C <sub>26</sub> H <sub>24</sub> O <sub>12</sub> |
| Procumbenoside J                                                                                                                                | 552 | C <sub>29</sub> H <sub>28</sub> O <sub>11</sub> |
| Procumbenoside K                                                                                                                                | 532 | C <sub>26</sub> H <sub>28</sub> O <sub>12</sub> |
| Procumbenoside L                                                                                                                                | 502 | C <sub>25</sub> H <sub>26</sub> O <sub>11</sub> |
| Procumbenoside M                                                                                                                                | 738 | C <sub>37</sub> H <sub>38</sub> O <sub>16</sub> |
| Procumbenoside N (7-O-[β-D-Xylopyranosyl-(1'''→2'')-β-D-glucopyranosyl]-diphyllin)                                                              | 674 | C <sub>32</sub> H <sub>34</sub> O <sub>16</sub> |
| Procumbenoside O (7-O-[β-D-Glucopyranosyl-(1''''→5'')-β-D-xylopyranosyl-(1'''→2'')-β-D-apiofuranosyl]-diphyllin)                                | 806 | C <sub>37</sub> H <sub>42</sub> O <sub>20</sub> |
| Cleistanthin B                                                                                                                                  | 542 | C <sub>27</sub> H <sub>26</sub> O <sub>12</sub> |
| Ciliatoside A (4-O-[α-L-Arabinopyranosyl-(1'''→2'')-β-D-xylopyranosyl-(1''''→5'')-β-D-apiofuranosyl]diphyllin)                                  | 776 | C <sub>36</sub> H <sub>40</sub> O <sub>19</sub> |
| Ciliatoside B (4-O-[[β-D-Apiofuranosyl-(1''''→3'')-α-L-arabinopyranosyl-(1'''→2'')][β-D-xylopyranosyl-(1''''→5'')]-β-D-apiofuranosyl]diphyllin) | 908 | C <sub>41</sub> H <sub>48</sub> O <sub>23</sub> |
| Azizin (4-O-[β-D-Xylopyranosyl-(1'''→2'')-β-D-xylopyranosyl-(1''''→5'')-β-D-apiofuranosyl]diphyllin)                                            | 776 | C <sub>36</sub> H <sub>40</sub> O <sub>19</sub> |
| Justatropmer A (4-O-β-D-Apiofuranosyl-6'-hydroxydiphyllin)                                                                                      | 528 | C <sub>26</sub> H <sub>24</sub> O <sub>12</sub> |
| Justatropmer B (4-O-β-D-apiofuranosyl-6'-hydroxydiphyllin)                                                                                      | 528 | C <sub>26</sub> H <sub>24</sub> O <sub>12</sub> |
| Justatropmer C (4-O-[β-D-Xylopyranosyl-(1→2)-β-D-apiofuranosyl]-6'-hydroxydiphyllin)                                                            | 660 | C <sub>31</sub> H <sub>32</sub> O <sub>16</sub> |
| Justatropmer D (4-O-[β-D-Xylopyranosyl-(1→2)-β-D-apiofuranosyl]-6'-hydroxydiphyllin)                                                            | 660 | C <sub>31</sub> H <sub>32</sub> O <sub>16</sub> |
| Justatropmer E (4-O-[Bis-β-D-xylopyranosyl-(1→2, 1→5)-β-D- apiofuranosyl]-6'-hydroxydiphyllin)                                                  | 792 | C <sub>36</sub> H <sub>40</sub> O <sub>20</sub> |
| Justatropmer F (4-O-[Bis-β-D-xylopyranosyl-(1→2, 1→5)-β-D- apiofuranosyl]-6'-hydroxydiphyllin)                                                  | 792 | C <sub>36</sub> H <sub>40</sub> O <sub>20</sub> |
| Justatropmer G (4-O-[[β-D-Apiofuranosyl-(1→3)-β-D-xylopyranosyl-(1→2)][β-D-xylopyranosyl-(1 → 5)]-β-D-apiofuranosyl]-6'-hydroxydiphyllin)       | 924 | C <sub>41</sub> H <sub>48</sub> O <sub>24</sub> |
| Justatropmer H (4-O-[[β-D-Apiofuranosyl-(1→3)-β-D-xylopyranosyl-(1→2)][β-D-xylopyranosyl-(1 → 5)]-β-D-apiofuranosyl]-6'-hydroxydiphyllin)       | 924 | C <sub>41</sub> H <sub>48</sub> O <sub>24</sub> |
| Justatropmer I (6'-O-β-D-Glucopyranosyldiphyllin)                                                                                               | 558 | C <sub>27</sub> H <sub>26</sub> O <sub>13</sub> |
| Justatropmer J (4-O-β-D-Glucopyranosyl-6'-hydroxyl-diphyllin)                                                                                   | 558 | C <sub>27</sub> H <sub>26</sub> O <sub>13</sub> |
| Justatropmer K (4-O-β-D-Glucopyranosyl-6'-hydroxyl-diphyllin)                                                                                   | 558 | C <sub>27</sub> H <sub>26</sub> O <sub>13</sub> |

|                                                                    |     |                                                 |
|--------------------------------------------------------------------|-----|-------------------------------------------------|
| Justatropmer L (6'-O-[[β-D-6-O-Acetylglucopyranosyl]-justicidin B) | 584 | C <sub>29</sub> H <sub>28</sub> O <sub>13</sub> |
| Justatropmer M (6'-O-β-D-Glucopyranosyl-retro-justicidin A)        | 572 | C <sub>28</sub> H <sub>28</sub> O <sub>13</sub> |
| Justin A                                                           | 444 | C <sub>24</sub> H <sub>28</sub> O <sub>8</sub>  |
| Justin B                                                           | 474 | C <sub>25</sub> H <sub>30</sub> O <sub>9</sub>  |
| Justin C                                                           | 490 | C <sub>26</sub> H <sub>34</sub> O <sub>9</sub>  |
| (-)-Dihydroclusin                                                  | 404 | C <sub>22</sub> H <sub>28</sub> O <sub>7</sub>  |
| (-)-Dihydroclusin diacetate                                        | 488 | C <sub>26</sub> H <sub>32</sub> O <sub>9</sub>  |
| Secoisolariciresinol                                               | 362 | C <sub>20</sub> H <sub>26</sub> O <sub>6</sub>  |
| Secoisolariciresinol dimethyl ether                                | 390 | C <sub>22</sub> H <sub>30</sub> O <sub>6</sub>  |
| Secoisolariciresinol dimethyl ether monoacetate                    | 432 | C <sub>24</sub> H <sub>32</sub> O <sub>7</sub>  |
| Secoisolariciresinol dimethyl ether diacetate                      | 474 | C <sub>26</sub> H <sub>34</sub> O <sub>8</sub>  |
| 5-Methoxy-4,4'-di-O-methylsecolariciresinol                        | 420 | C <sub>23</sub> H <sub>32</sub> O <sub>7</sub>  |
| 5-Methoxy-4,4'-di-O-methylsecolariciresinol monoacetate            | 462 | C <sub>25</sub> H <sub>34</sub> O <sub>8</sub>  |
| 5-Methoxy-4,4'-di-O-methylsecolariciresinol diacetate              | 504 | C <sub>27</sub> H <sub>36</sub> O <sub>9</sub>  |
| 2,3-Demethoxysecisolintetralin acetate                             | 458 | C <sub>25</sub> H <sub>30</sub> O <sub>8</sub>  |
| Hemiariensin                                                       | 400 | C <sub>22</sub> H <sub>24</sub> O <sub>7</sub>  |
| Ariensin                                                           | 442 | C <sub>24</sub> H <sub>26</sub> O <sub>8</sub>  |
| Rostellulin A                                                      | 472 | C <sub>25</sub> H <sub>28</sub> O <sub>9</sub>  |
| Hinokinin                                                          | 354 | C <sub>20</sub> H <sub>18</sub> O <sub>6</sub>  |
| Procumbiene                                                        | 368 | C <sub>20</sub> H <sub>16</sub> O <sub>7</sub>  |
| Juspurpudin                                                        | 368 | C <sub>20</sub> H <sub>16</sub> O <sub>7</sub>  |
| Pinoresinol                                                        | 372 | C <sub>21</sub> H <sub>24</sub> O <sub>6</sub>  |
| (-)-Syringaresinol                                                 | 418 | C <sub>22</sub> H <sub>26</sub> O <sub>8</sub>  |
| Lariciresinol                                                      | 360 | C <sub>20</sub> H <sub>24</sub> O <sub>6</sub>  |
| 5'-Methoxy-4'-O-methylariciresinol                                 | 418 | C <sub>23</sub> H <sub>30</sub> O <sub>7</sub>  |
| (7'S,8'R)-5,3'-Dimethoxy-4,4',9'-trihydroxy-2-8',9-O-7'-neolignan  | 360 | C <sub>20</sub> H <sub>24</sub> O <sub>6</sub>  |
| Arctigenin                                                         | 372 | C <sub>21</sub> H <sub>24</sub> O <sub>6</sub>  |
| Matairesinol                                                       | 358 | C <sub>20</sub> H <sub>22</sub> O <sub>6</sub>  |
| Secoisolariciresinol                                               | 362 | C <sub>20</sub> H <sub>26</sub> O <sub>6</sub>  |
| (7,8-cis-8,8'-trans)-2-4-Dihydroxyl-3,5-dimethoxy-lariciresinol    | 360 | C <sub>20</sub> H <sub>24</sub> O <sub>6</sub>  |
| (+)-Ferulasinkin A (7R, 8R, 7'R, 8'R)                              | 362 | C <sub>19</sub> H <sub>22</sub> O <sub>7</sub>  |
| (-)-Ferulasinkin A (7S, 8S, 7'S, 8'S)                              | 362 | C <sub>19</sub> H <sub>22</sub> O <sub>7</sub>  |
| (+)-Ferulasinkin B (7S, 8S, 7'R, 8'R)                              | 362 | C <sub>19</sub> H <sub>22</sub> O <sub>7</sub>  |
| (-)-Ferulasinkin B (7R, 8R, 7'S, 8'S)                              | 362 | C <sub>19</sub> H <sub>22</sub> O <sub>7</sub>  |
| (+)-Ferulasinkin C (7S, 8S, 7'R, 8'S)                              | 362 | C <sub>19</sub> H <sub>22</sub> O <sub>7</sub>  |
| (-)-Ferulasinkin C (7R, 8R, 7'S, 8'R)                              | 362 | C <sub>19</sub> H <sub>22</sub> O <sub>7</sub>  |

|                                          |     |                                                 |
|------------------------------------------|-----|-------------------------------------------------|
| (+)-Ferulasinkin D (7R, 8S, 7'S, 8'S)    | 362 | C <sub>19</sub> H <sub>22</sub> O <sub>7</sub>  |
| (-)-Ferulasinkin D (7S, 8R, 7'R, 8'R)    | 362 | C <sub>19</sub> H <sub>22</sub> O <sub>7</sub>  |
| (+)-Sinkianlignan A (7''S, 8''R)         | 518 | C <sub>30</sub> H <sub>30</sub> O <sub>8</sub>  |
| (-)-Sinkianlignan A (7''R, 8''S)         | 518 | C <sub>30</sub> H <sub>30</sub> O <sub>8</sub>  |
| (+)-Sinkianlignan B (7S, 8S, 7''S, 8''R) | 552 | C <sub>30</sub> H <sub>32</sub> O <sub>10</sub> |
| (-)-Sinkianlignan B (7R, 8R, 7''R, 8''S) | 552 | C <sub>30</sub> H <sub>32</sub> O <sub>10</sub> |
| (+)-Sinkianlignan C (7R, 8R, 9S, 7''R)   | 524 | C <sub>30</sub> H <sub>36</sub> O <sub>8</sub>  |
| (-)-Sinkianlignan C (7S, 8S, 9R, 7''S)   | 524 | C <sub>30</sub> H <sub>36</sub> O <sub>8</sub>  |
| (+)-Sinkianlignan D (7S, 8R, 9''S)       | 430 | C <sub>23</sub> H <sub>26</sub> O <sub>8</sub>  |
| (-)-Sinkianlignan D (7R, 8S, 9''R)       | 430 | C <sub>23</sub> H <sub>26</sub> O <sub>8</sub>  |
| (+)-Sinkianlignan E (7S, 8S)             | 358 | C <sub>21</sub> H <sub>26</sub> O <sub>5</sub>  |
| (-)-Sinkianlignan E (7R, 8R)             | 358 | C <sub>21</sub> H <sub>26</sub> O <sub>5</sub>  |
| (+)-Sinkianlignan F (7R, 8S)             | 358 | C <sub>21</sub> H <sub>26</sub> O <sub>5</sub>  |
| (-)-Sinkianlignan F (7S, 8R)             | 358 | C <sub>21</sub> H <sub>26</sub> O <sub>5</sub>  |
| (+)-Sinkianlignan G (7R, 8S, 7'R, 8'S)   | 376 | C <sub>20</sub> H <sub>24</sub> O <sub>7</sub>  |
| (-)-Sinkianlignan G (7S, 8R, 7'S, 8'R)   | 376 | C <sub>20</sub> H <sub>24</sub> O <sub>7</sub>  |
| (+)-Sinkianlignan H (7S, 8R, 7'R, 8'S)   | 376 | C <sub>20</sub> H <sub>24</sub> O <sub>7</sub>  |
| (-)-Sinkianlignan H (7R, 8S, 7'S, 8'R)   | 376 | C <sub>20</sub> H <sub>24</sub> O <sub>7</sub>  |
| (+)-Sinkianlignan I (7R, 8R, 7'S, 8'S)   | 376 | C <sub>20</sub> H <sub>24</sub> O <sub>7</sub>  |
| (-)-Sinkianlignan I (7S, 8S, 7'R, 8'R)   | 376 | C <sub>20</sub> H <sub>24</sub> O <sub>7</sub>  |
| (+)-Sinkianlignan J (7R, 8R, 7'R, 8'R)   | 376 | C <sub>20</sub> H <sub>24</sub> O <sub>7</sub>  |
| (-)-Sinkianlignan J (7S, 8S, 7'S, 8'S)   | 376 | C <sub>20</sub> H <sub>24</sub> O <sub>7</sub>  |
| (+)-Sinkianlignan K (7R, 8S, 7'S, 8'R)   | 376 | C <sub>20</sub> H <sub>24</sub> O <sub>7</sub>  |
| (-)-Sinkianlignan K (7S, 8S, 7'R, 8'S)   | 376 | C <sub>20</sub> H <sub>24</sub> O <sub>7</sub>  |
| Neoarctin A                              | 742 | C <sub>42</sub> H <sub>46</sub> O <sub>12</sub> |
| Arctiin                                  | 534 | C <sub>27</sub> H <sub>34</sub> O <sub>11</sub> |
